# Supplementary material for: Water Dynamics in Starch Based Confectionery Products including Different Types of Sugar
Source: MDPI journal article supplement (doi:10.3390/molecules27072216), 2022-03-29
Supplement: s1 [file s1]

## Supplementary Material

FigureS1–S8: Normalized magnetization curves.

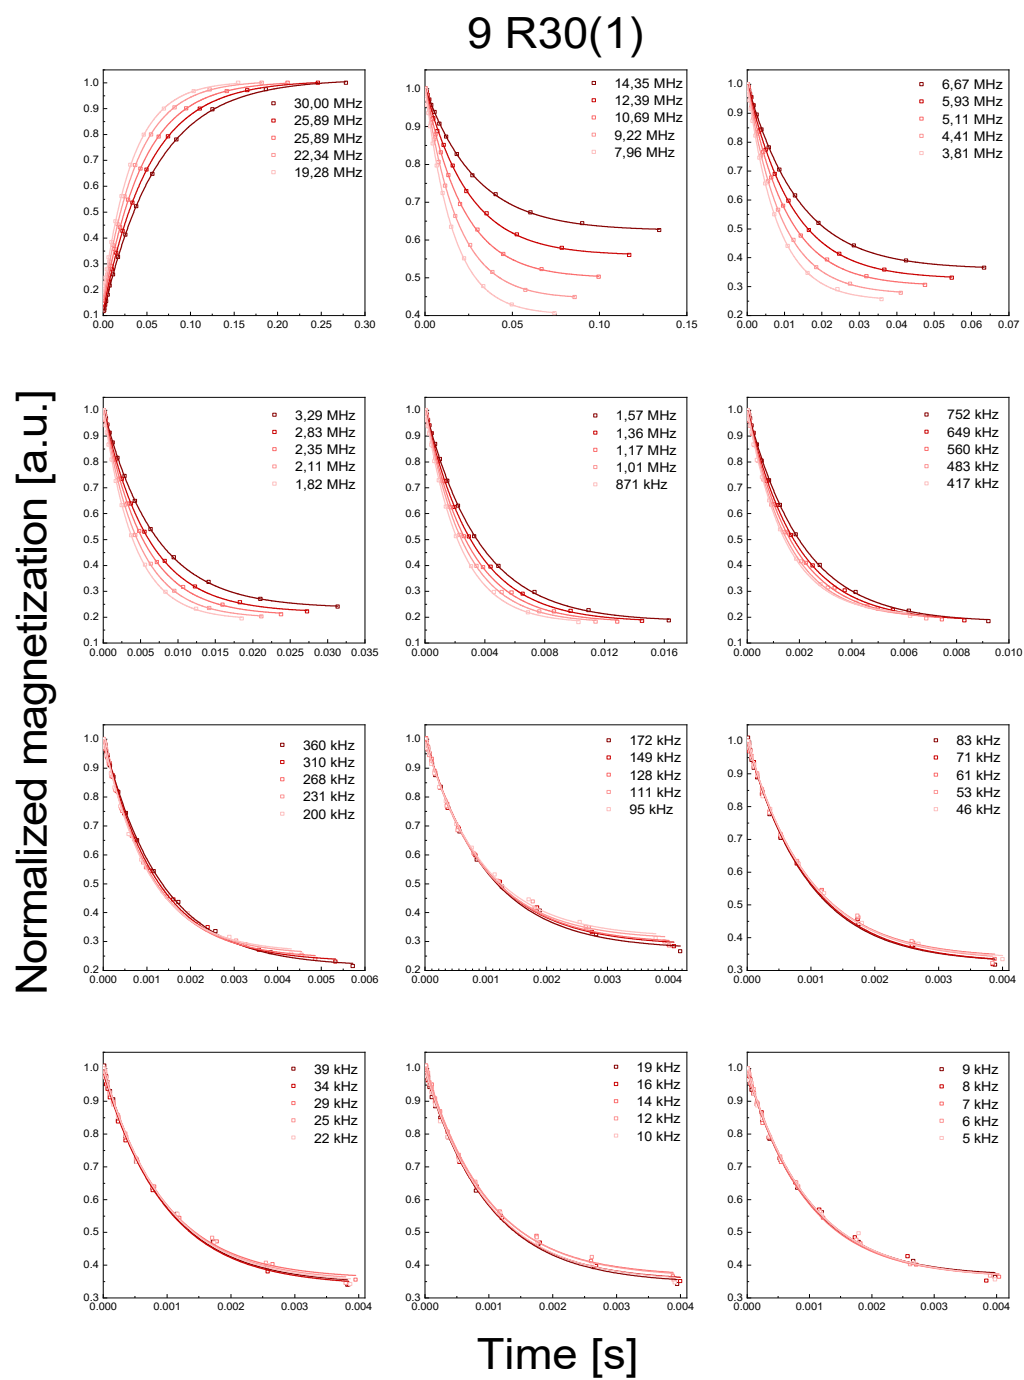

# 9 R30(2)

Normalized magnetization [a.u.]

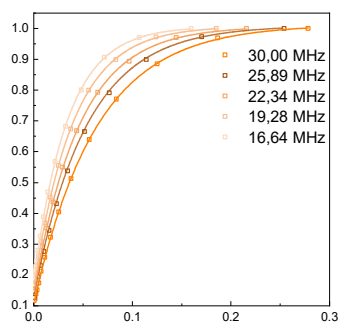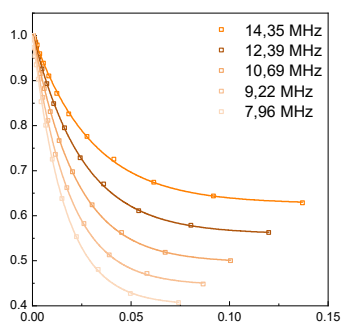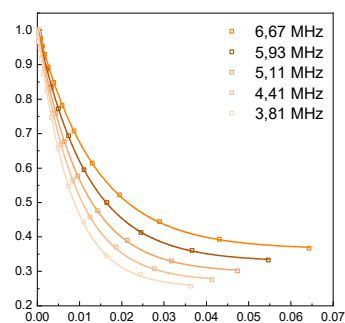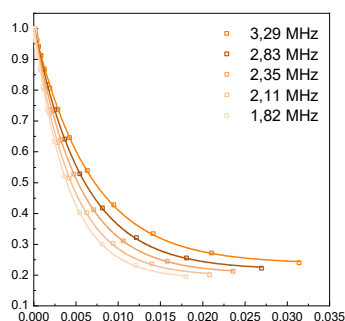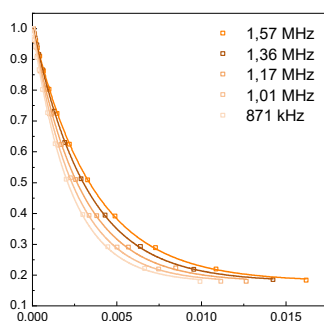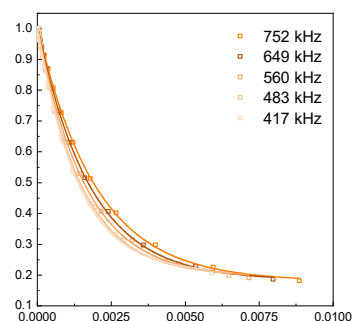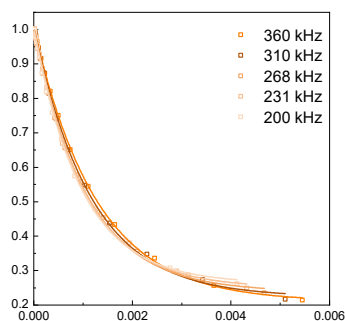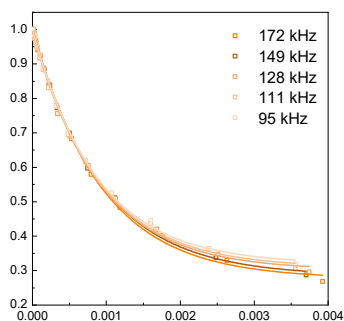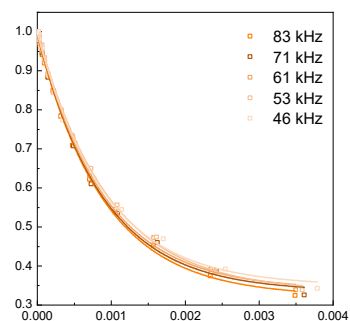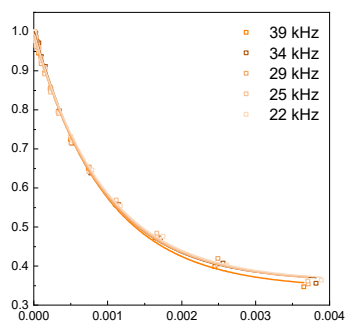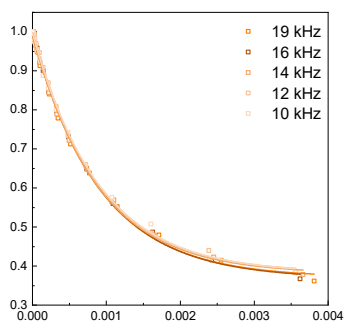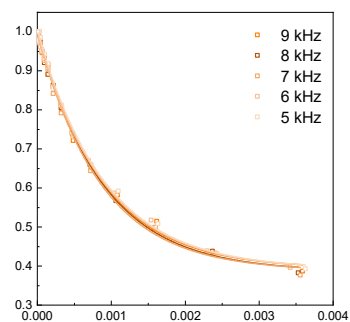

Time [s]

# 9 S30(1)

Normalized magnetization [a.u.]

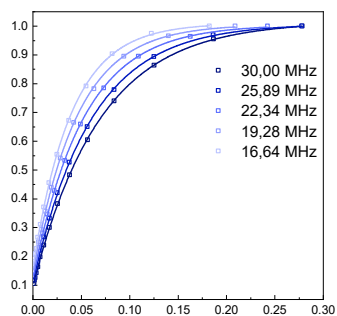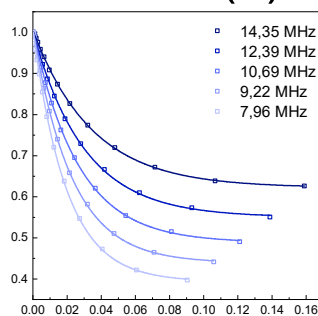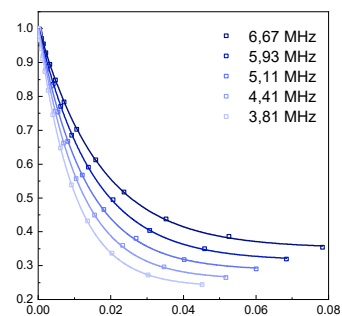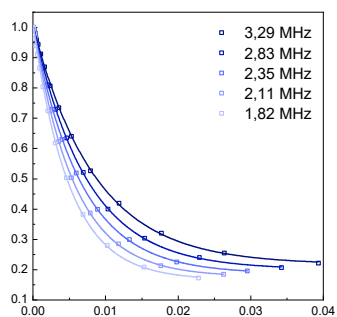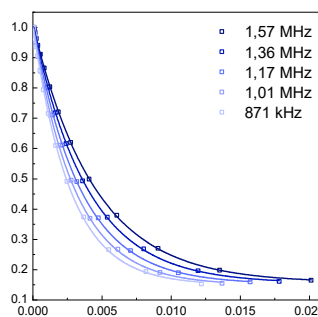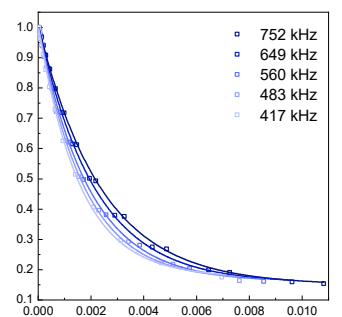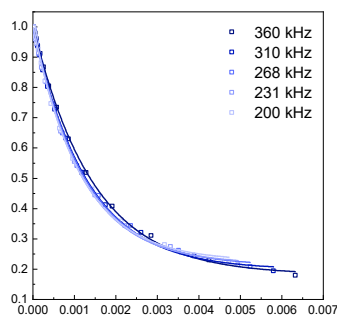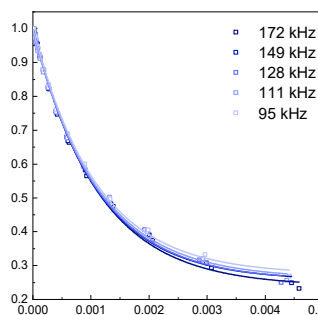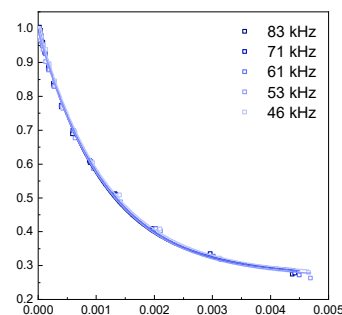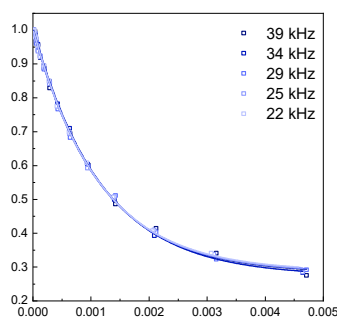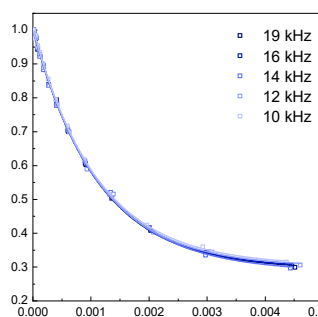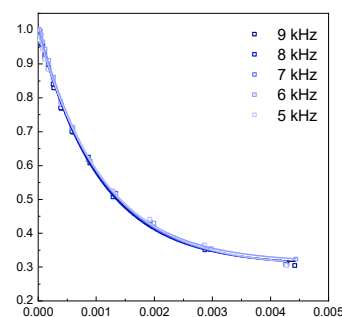

Time [s]

# 9 S30(2)

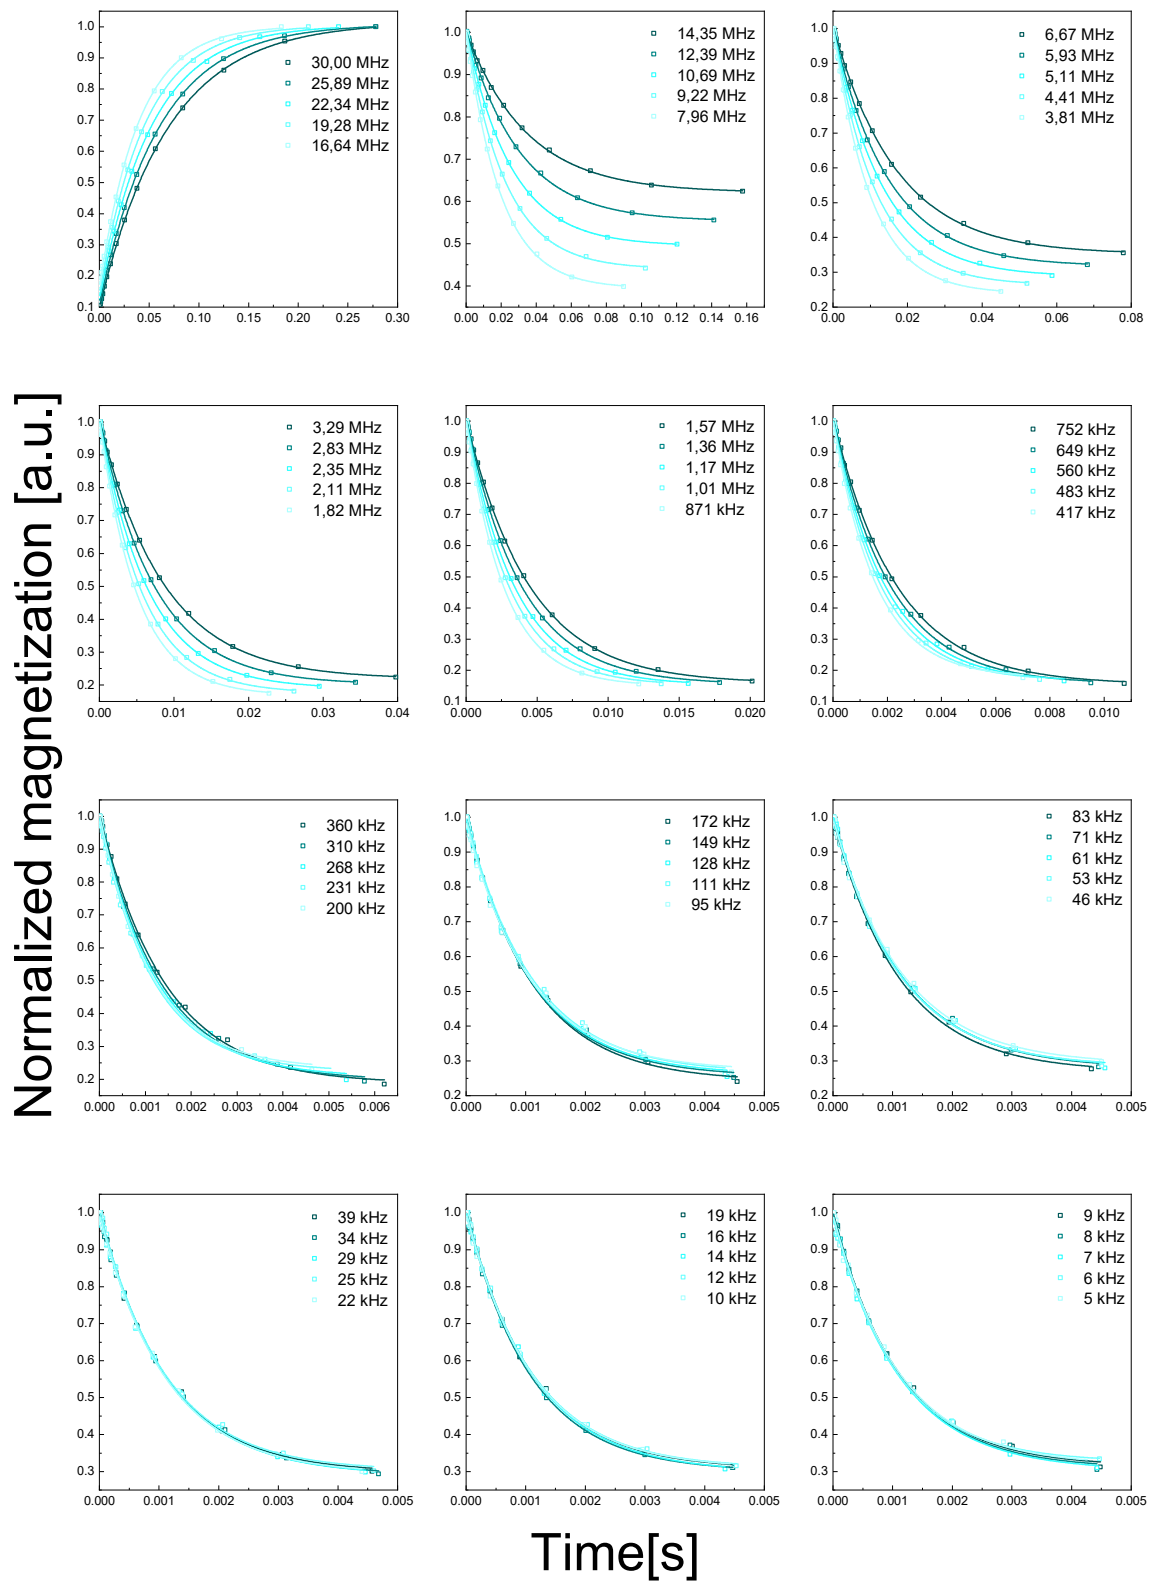

# 11 S30(1)

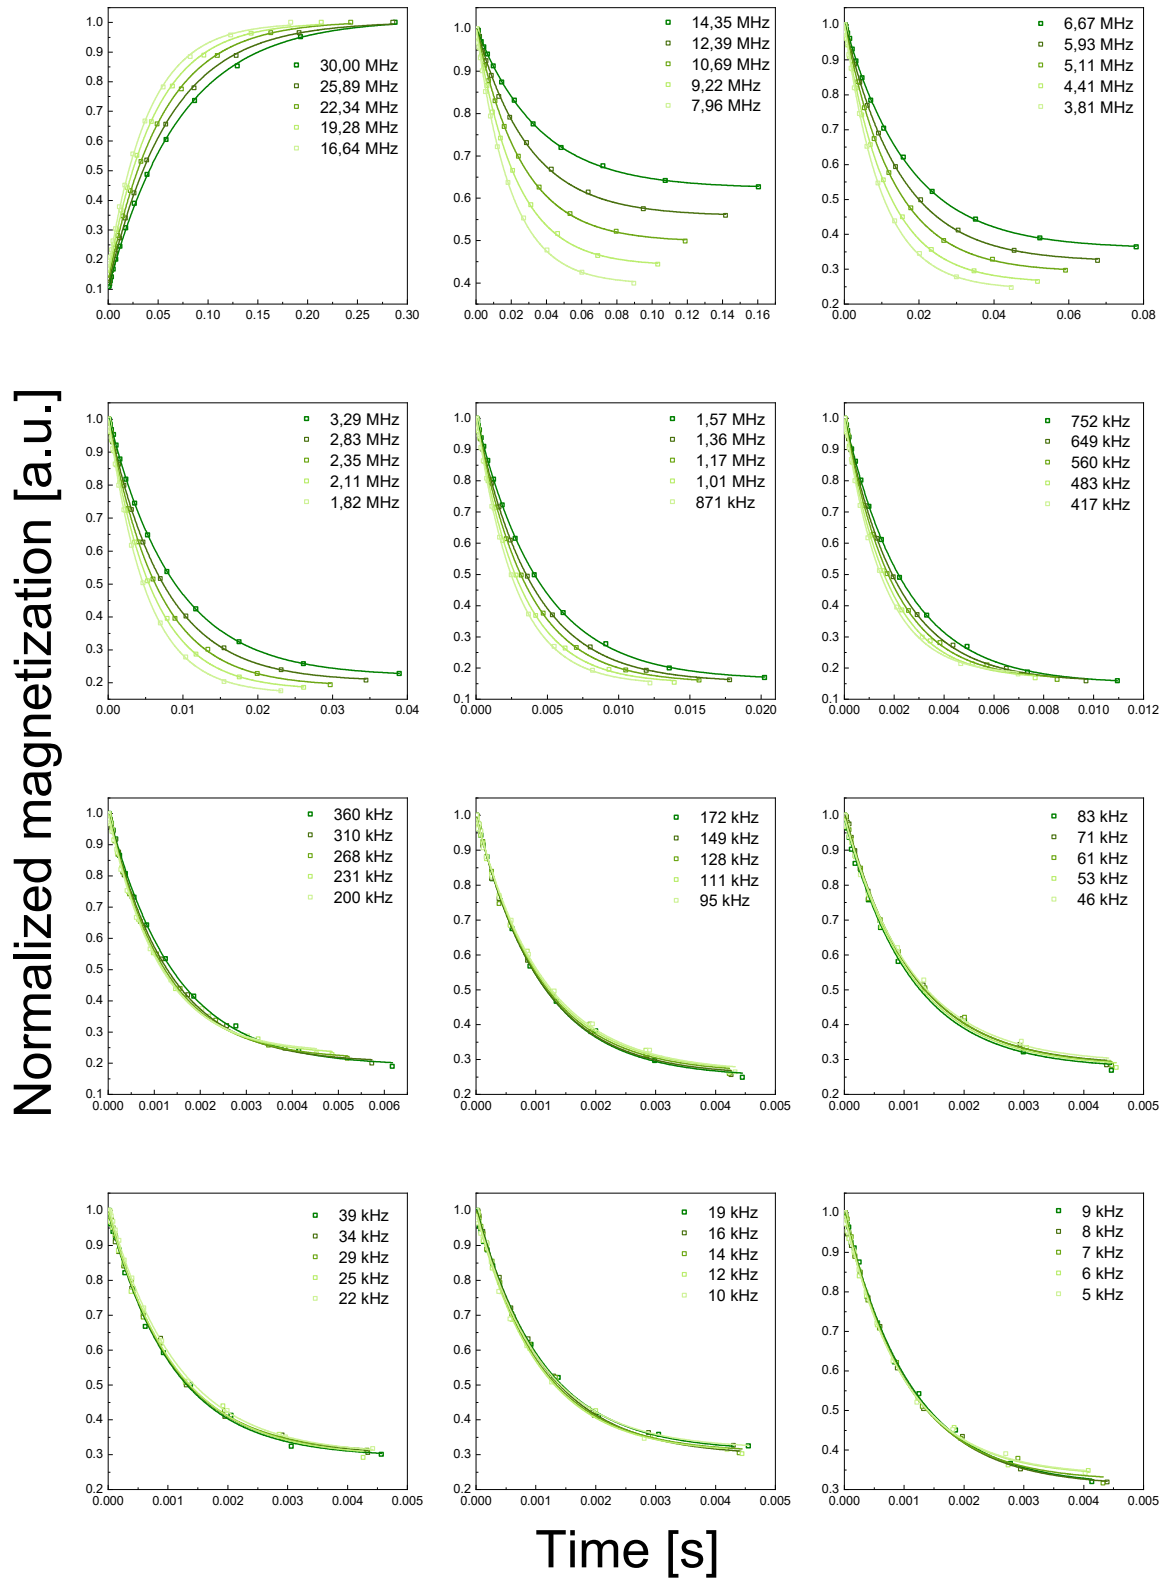

# 11 S30(2)

Normalized magnetization [a.u.]

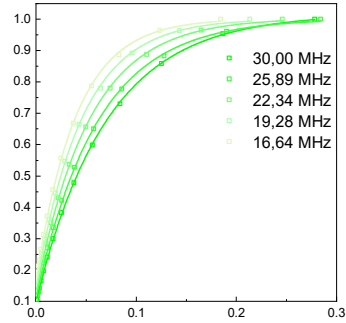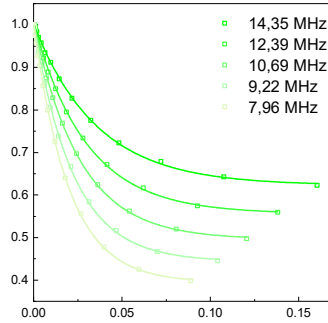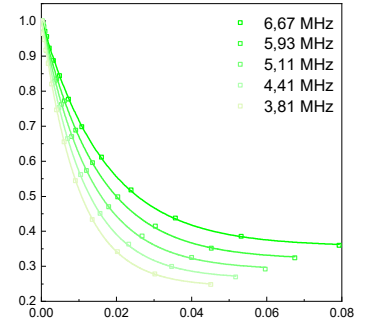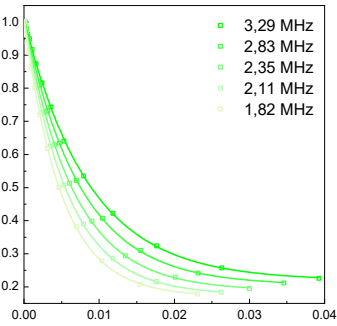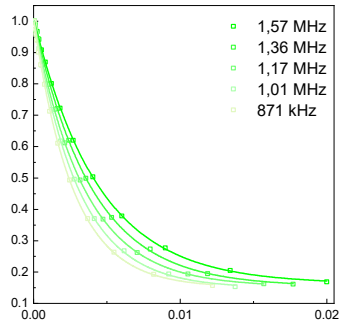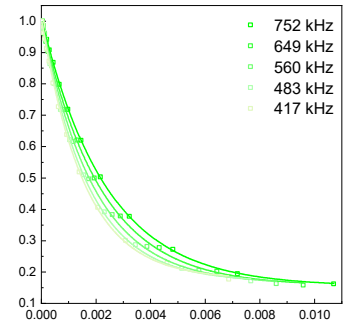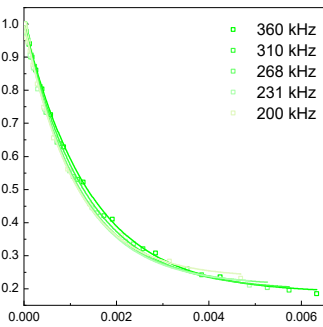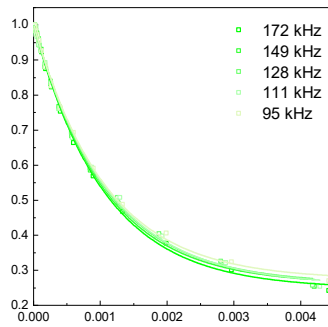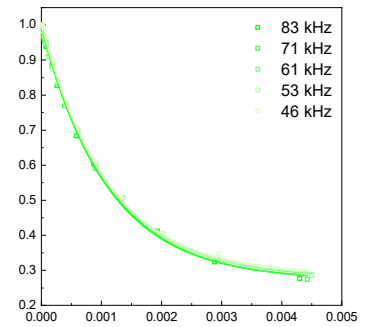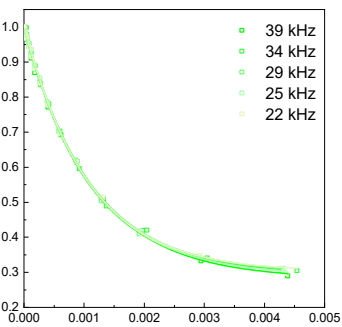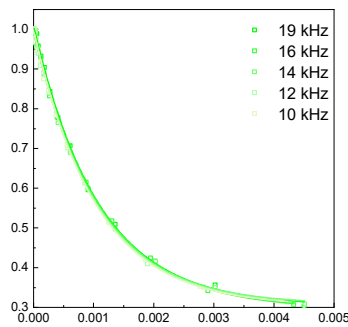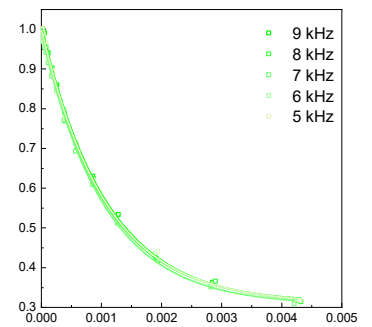

Time [s]

# 11 R30(1)

Normalized magnetization [a.u.]

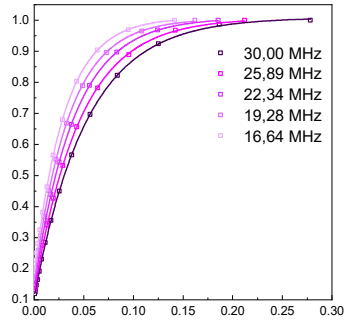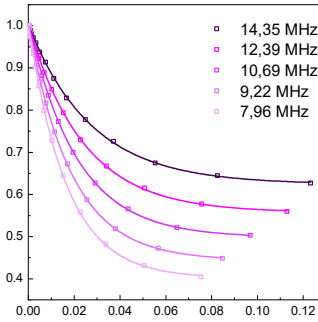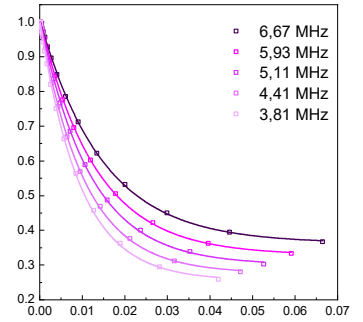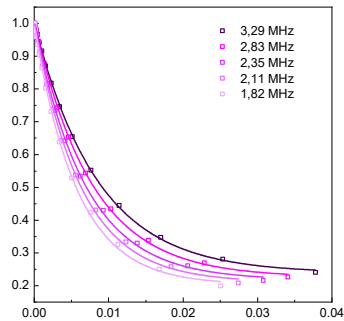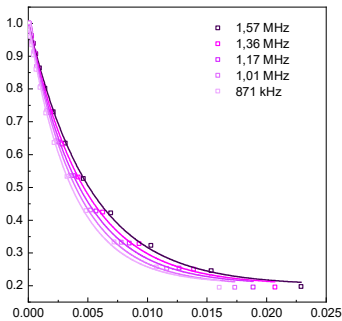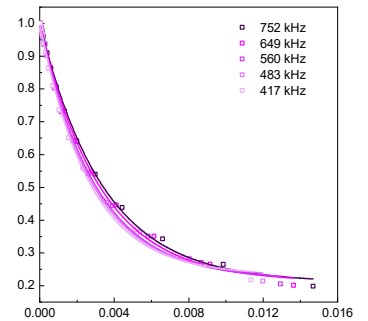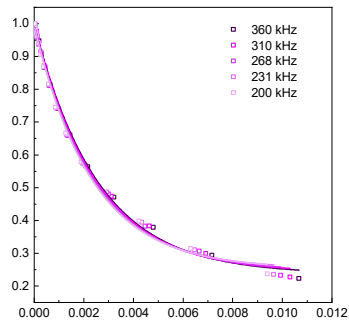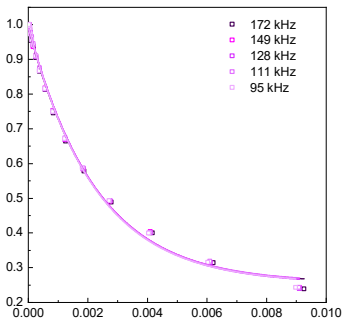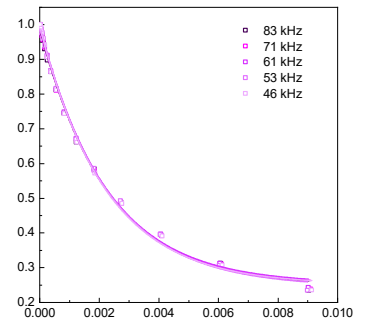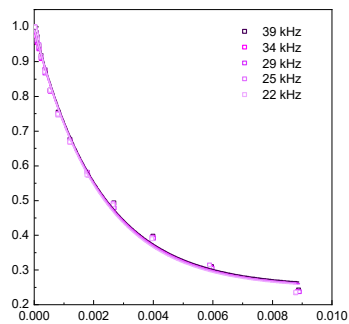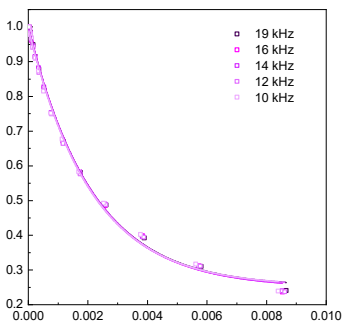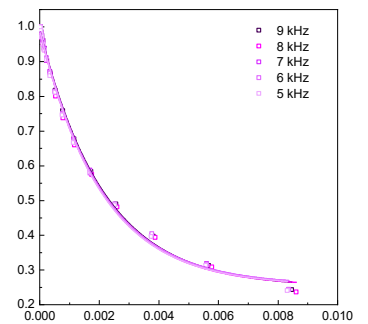

Time [s]

# 11 R30(2)

Normalized magnetization [a.u.]

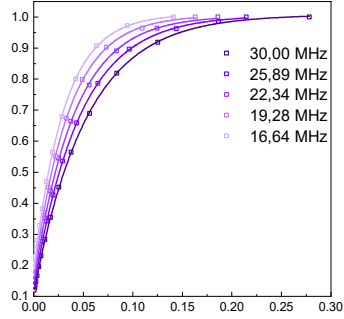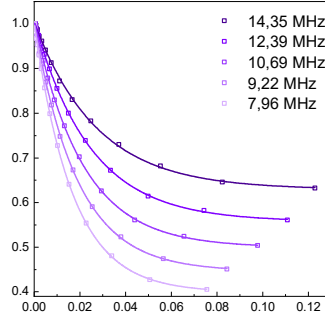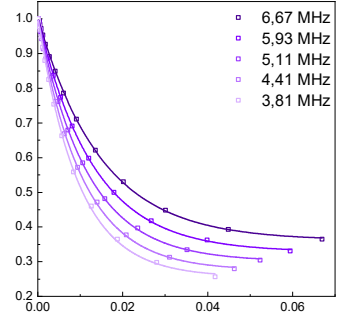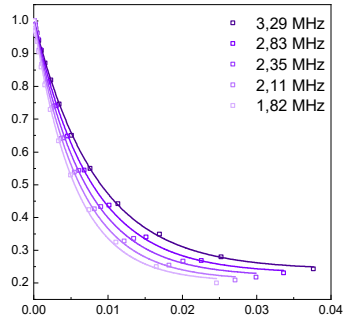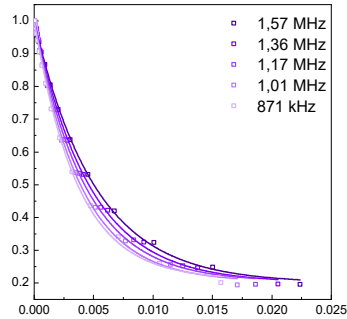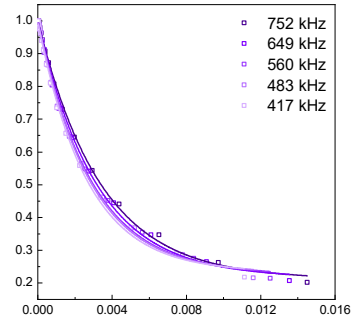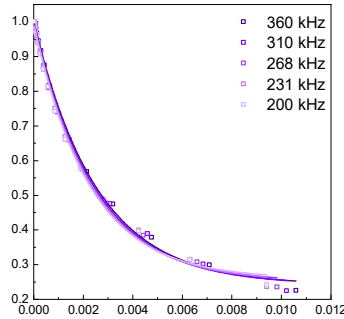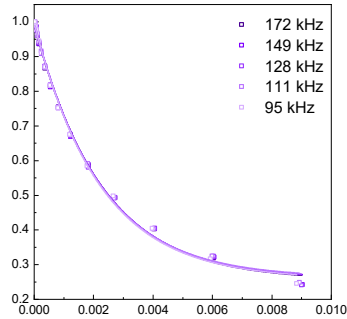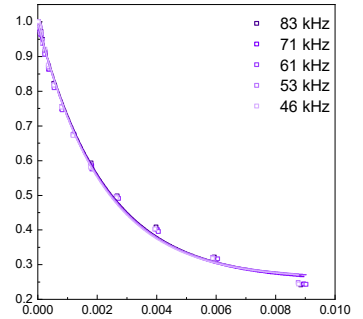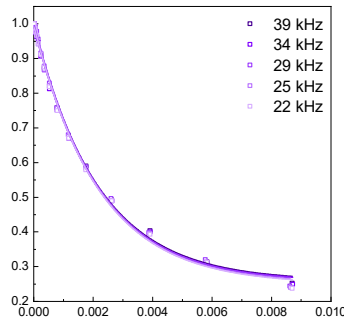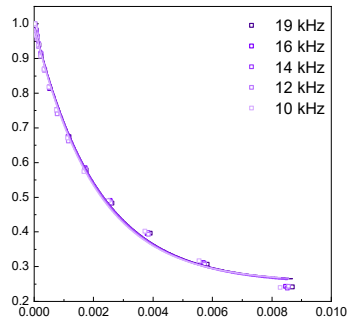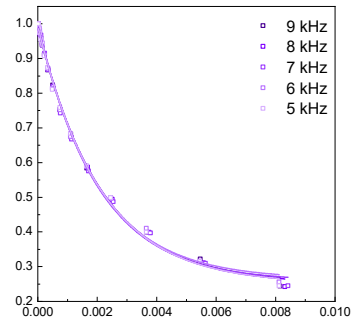

Time [s]
